# Supplementary material for: SV-plaudit: A cloud-based framework for manually curating thousands of structural variants
Source: PubMed Central journal article supplement (PMC6030999; doi:10.1093/gigascience/giy064), 2018-05-31
Supplement: giy064_giga-d-18-00103_original_submission.pdf [file giy064_giga-d-18-00103_original_submission.pdf]

# GigaScience

## SV-plaudit: A cloud-based framework for manually curating thousands of structural variants

--Manuscript Draft--

|                                                      |                                                                                                                                                                                                                                                                                                                                                                                                                                                                                                                                                                                                                                                          |                    |
|------------------------------------------------------|----------------------------------------------------------------------------------------------------------------------------------------------------------------------------------------------------------------------------------------------------------------------------------------------------------------------------------------------------------------------------------------------------------------------------------------------------------------------------------------------------------------------------------------------------------------------------------------------------------------------------------------------------------|--------------------|
| <b>Manuscript Number:</b>                            | GIGA-D-18-00103                                                                                                                                                                                                                                                                                                                                                                                                                                                                                                                                                                                                                                          |                    |
| <b>Full Title:</b>                                   | SV-plaudit: A cloud-based framework for manually curating thousands of structural variants                                                                                                                                                                                                                                                                                                                                                                                                                                                                                                                                                               |                    |
| <b>Article Type:</b>                                 | Research                                                                                                                                                                                                                                                                                                                                                                                                                                                                                                                                                                                                                                                 |                    |
| <b>Funding Information:</b>                          | National Human Genome Research Institute (K99HG009532)                                                                                                                                                                                                                                                                                                                                                                                                                                                                                                                                                                                                   | Dr Ryan Layer      |
|                                                      | National Human Genome Research Institute (R01HG006693)                                                                                                                                                                                                                                                                                                                                                                                                                                                                                                                                                                                                   | Dr Aaron R Quinlan |
|                                                      | National Human Genome Research Institute (R01GM124355)                                                                                                                                                                                                                                                                                                                                                                                                                                                                                                                                                                                                   | Dr Aaron R Quinlan |
|                                                      | National Cancer Institute (US) (U24CA209999)                                                                                                                                                                                                                                                                                                                                                                                                                                                                                                                                                                                                             | Dr Aaron R Quinlan |
| <b>Abstract:</b>                                     | SV-plaudit is a framework for rapidly curating structural variant (SVs) predictions. For each SV, we generate an image that visualizes the coverage and alignment signals from a set of samples. Images are uploaded to our cloud framework where users assess the quality of each image using a client-side web application. Reports can then be generated as a tab-delimited file or annotated VCF. As a proof of principle, nine researchers collaborated for one hour to evaluate 1,350 SVs each. We anticipate that SV-plaudit will become a standard step in variant calling pipelines and the crowd-sourced curation of other biological results. |                    |
| <b>Corresponding Author:</b>                         | Ryan Layer<br><br>UNITED STATES                                                                                                                                                                                                                                                                                                                                                                                                                                                                                                                                                                                                                          |                    |
| <b>Corresponding Author Secondary Information:</b>   |                                                                                                                                                                                                                                                                                                                                                                                                                                                                                                                                                                                                                                                          |                    |
| <b>Corresponding Author's Institution:</b>           |                                                                                                                                                                                                                                                                                                                                                                                                                                                                                                                                                                                                                                                          |                    |
| <b>Corresponding Author's Secondary Institution:</b> |                                                                                                                                                                                                                                                                                                                                                                                                                                                                                                                                                                                                                                                          |                    |
| <b>First Author:</b>                                 | Jonathan R Belyeu                                                                                                                                                                                                                                                                                                                                                                                                                                                                                                                                                                                                                                        |                    |
| <b>First Author Secondary Information:</b>           |                                                                                                                                                                                                                                                                                                                                                                                                                                                                                                                                                                                                                                                          |                    |
| <b>Order of Authors:</b>                             | Jonathan R Belyeu                                                                                                                                                                                                                                                                                                                                                                                                                                                                                                                                                                                                                                        |                    |
|                                                      | Thomas J Nicholas, PHD                                                                                                                                                                                                                                                                                                                                                                                                                                                                                                                                                                                                                                   |                    |
|                                                      | Brent S Pedersen, PHD                                                                                                                                                                                                                                                                                                                                                                                                                                                                                                                                                                                                                                    |                    |
|                                                      | Thomas A Sasani                                                                                                                                                                                                                                                                                                                                                                                                                                                                                                                                                                                                                                          |                    |
|                                                      | James M Havrilla                                                                                                                                                                                                                                                                                                                                                                                                                                                                                                                                                                                                                                         |                    |
|                                                      | Stephanie N Kravitz                                                                                                                                                                                                                                                                                                                                                                                                                                                                                                                                                                                                                                      |                    |
|                                                      | Megan E Conway                                                                                                                                                                                                                                                                                                                                                                                                                                                                                                                                                                                                                                           |                    |
|                                                      | Brian K Lohman, PHD                                                                                                                                                                                                                                                                                                                                                                                                                                                                                                                                                                                                                                      |                    |
|                                                      | Aaron R Quinlan, PHD                                                                                                                                                                                                                                                                                                                                                                                                                                                                                                                                                                                                                                     |                    |
| Ryan Layer                                           |                                                                                                                                                                                                                                                                                                                                                                                                                                                                                                                                                                                                                                                          |                    |
| <b>Order of Authors Secondary Information:</b>       |                                                                                                                                                                                                                                                                                                                                                                                                                                                                                                                                                                                                                                                          |                    |

| <b>Additional Information:</b>                                                                                                                                                                                                                                                                                                                                                                                                                                                                                                                          |                 |
|---------------------------------------------------------------------------------------------------------------------------------------------------------------------------------------------------------------------------------------------------------------------------------------------------------------------------------------------------------------------------------------------------------------------------------------------------------------------------------------------------------------------------------------------------------|-----------------|
| <b>Question</b>                                                                                                                                                                                                                                                                                                                                                                                                                                                                                                                                         | <b>Response</b> |
| Are you submitting this manuscript to a special series or article collection?                                                                                                                                                                                                                                                                                                                                                                                                                                                                           | No              |
| <p><b>Experimental design and statistics</b></p> <p>Full details of the experimental design and statistical methods used should be given in the Methods section, as detailed in our <a href="#">Minimum Standards Reporting Checklist</a>. Information essential to interpreting the data presented should be made available in the figure legends.</p> <p>Have you included all the information requested in your manuscript?</p>                                                                                                                      | Yes             |
| <p><b>Resources</b></p> <p>A description of all resources used, including antibodies, cell lines, animals and software tools, with enough information to allow them to be uniquely identified, should be included in the Methods section. Authors are strongly encouraged to cite <a href="#">Research Resource Identifiers</a> (RRIDs) for antibodies, model organisms and tools, where possible.</p> <p>Have you included the information requested as detailed in our <a href="#">Minimum Standards Reporting Checklist</a>?</p>                     | Yes             |
| <p><b>Availability of data and materials</b></p> <p>All datasets and code on which the conclusions of the paper rely must be either included in your submission or deposited in <a href="#">publicly available repositories</a> (where available and ethically appropriate), referencing such data using a unique identifier in the references and in the “Availability of Data and Materials” section of your manuscript.</p> <p>Have you have met the above requirement as detailed in our <a href="#">Minimum Standards Reporting Checklist</a>?</p> | Yes             |

# 1 **SV-plaudit: A cloud-based framework for manually curating thousands of structural** 2 3 4 **variants**

5  
6  
7  
8  
9 Jonathan R. Belyeu<sup>1,2</sup>, Thomas J. Nicholas<sup>1,2</sup>, Brent S. Pedersen<sup>1,2</sup>, Thomas A. Sasani<sup>1,2</sup>, James M. Havrilla<sup>1,2</sup>,  
10  
11 Stephanie N. Kravitz<sup>1,2</sup>, Megan E. Conway<sup>1</sup>, Brian K. Lohman<sup>1,2</sup>, Aaron R. Quinlan<sup>1,2,3+</sup>, Ryan M. Layer<sup>1,2+</sup>  
12

13  
14  
15  
16 1. Department of Human Genetics, University of Utah, Salt Lake City, UT

17  
18 2. USTAR Center for Genetic Discovery, University of Utah, Salt Lake City, UT

19  
20 3. Department of Biomedical Informatics, University of Utah, Salt Lake City, UT

21  
22  
23  
24 + *To whom correspondence should be addressed*  
25

## 26 27 28 29 **ABSTRACT**

30  
31  
32 *SV-plaudit* is a framework for rapidly curating structural variant (SVs) predictions. For each SV, we generate an  
33  
34 image that visualizes the coverage and alignment signals from a set of samples. Images are uploaded to our  
35  
36 cloud framework where users assess the quality of each image using a client-side web application. Reports can  
37  
38 then be generated as a tab-delimited file or annotated VCF. As a proof of principle, nine researchers collaborated  
39  
40 for one hour to evaluate 1,350 SVs each. We anticipate that *SV-plaudit* will become a standard step in variant  
41  
42 calling pipelines and the crowd-sourced curation of other biological results.  
43  
44

45  
46  
47  
48 Code available at <https://github.com/jbelyeu/SV-plaudit>  
49

50  
51  
52  
53 Demonstration video available at <https://www.youtube.com/watch?v=ono8kHMKxDs>  
54

## 54 55 **KEYWORDS**

56  
57 Structural variants; Visualization; Manual curation  
58

## 59 60 61 **BACKGROUND**

1 1 Large genomic rearrangements, or structural variants (SVs), are an abundant form of genetic variation within the  
2  
3 human genome<sup>1,2</sup>, and they play an important role in both species evolution<sup>3,4</sup> and human disease phenotypes<sup>5-9</sup>.  
4  
5 While many methods have been developed to identify SVs from whole-genome sequencing (WGS) data<sup>10-14</sup>, the  
6  
7 accuracy of SV prediction remains far below that of single-nucleotide and insertion-deletion variants<sup>1</sup>.  
8  
9 Improvements to SV detection algorithms have, in part, been limited by the availability and applicability of high-  
10  
11 quality truth sets. While the Genome in a Bottle<sup>15</sup> consortium has made considerable progress toward a gold-  
12  
13 standard variant truth set, the incredibly high quality of the data underlying this project (300X and PCR-free) calls  
14  
15 into question the generality of the accuracy obtained in typical quality WGS datasets (30X with PCR-  
16  
17 amplification).  
18  
19

20  
21  
22  
23  
24 Given the high false positive rate of SV calls from genome and exome sequencing, manual inspection is a critical  
25  
26 quality control step, especially in clinical cases. Scrutiny of the evidence supporting an SV is considered to be a  
27  
28 reliable "dry bench" validation technique, as the human eye can rapidly distinguish true SV signal from alignment  
29  
30 artifacts. In principle, we could improve the accuracy of SV call sets by visually validating every variant. In  
31  
32 practice, however, current genomic data visualization methods<sup>16-21</sup> were designed primarily for spot checking a  
33  
34 small number of variants and are difficult to scale to the thousands of SVs in typical call sets. Therefore, a curated  
35  
36 set of SVs requires a new framework that scales to thousands of SVs, minimizes the time needed to adjudicate  
37  
38 individual variants, and manages the collective judgment of large and often geographically dispersed teams.  
39  
40

41  
42  
43  
44 Here we present *SV-plaudit*, a fast, highly-scalable framework enabling teams of any size to collaborate on the  
45  
46 rapid, web-based curation of thousands of SVs. In the web interface, users answer a curation question (e.g. is  
47  
48 this variant a somatic variant, a germline variant, or a false positive) for a series of pre-computed images (**Fig 1**)  
49  
50 that contain the coverage, paired-end alignments, and split-read alignments for the region surrounding a  
51  
52 candidate SV for a set of relevant samples (e.g., tumor and matched normal samples). Responses are collected  
53  
54 and returned as a report which can be used to identify high-quality variants.  
55  
56

57  
58  
59  
60 While a team of curators is not required, collecting multiple opinions for each SV allows *SV-plaudit* to report the  
61  
62 consensus view (i.e., a "curation score") of each variant. This consensus is less susceptible to human error and  
63  
64

1 1 does not require expert users to score variants. With *SV-plaudit*, it is practical to inspect and score every variant  
2  
3 in a call set, thereby improving the accuracy of SV predictions in individual genomes, and curating high quality-  
4  
5 truth sets for SV method tuning.  
6  
7  
8  
9

## 10 RESULTS

11  
12 To assess *SV-plaudit's* utility for curating SVs, nine researchers in the Quinlan laboratory at the University of  
13  
14 Utah manually inspected and scored the 1,350 SVs (1,310 deletions, 8 duplications, 4 insertions, and 28  
15  
16 inversions) that the 1000 Genomes Project identified in the NA12878 genome (**Supplemental File 1**). Since we  
17  
18 expect trio analysis to be a common use case of *SV-plaudit*, we included alignments from NA12878 and her  
19  
20 parents (NA12891 and NA12892), and participants considered the curation questions “The SV in the top sample  
21  
22 (NA12878) is:” and answers “GOOD”, “BAD”, or “DE NOVO”. In total, the full experiment took less than two hours  
23  
24 with Amazon costs totaling less than \$0.05. The images (**Supplemental File 2**) were generated in 3 minutes (20  
25  
26 threads, 2.7 seconds per image) and uploading to S3 required 5 minutes (full command list in **Supplemental**  
27  
28 **File 3**). The mean time to score all images was 60.1 minutes (2.67 seconds per image) (**Fig 2A**, reports in  
29  
30 **Supplemental Files 4,5**). In the scoring process, no de novo variants were identified. 40 images did not render  
31  
32 correctly due to issues in the alignment files (e.g., coverage gaps) and were removed from the subsequent  
33  
34 analysis (**Supplemental File 6**).  
35  
36  
37  
38  
39  
40  
41

42 For this experiment, we use a curation score that mapped “GOOD” and “DE NOVO” to the value one, “BAD” to  
43  
44 the value zero, and the mean as the aggregation function (**Fig 2B**). Most (70.5%) of variants were scored  
45  
46 unanimously, with 67.1% being unanimously “GOOD” (score = 1.0, e.g., **Fig 1A**) and 3.4% being unanimously  
47  
48 “BAD” (score = 0.0, e.g. **Fig 1B**). Since we had nine scores for each variant, we expanded our definition of  
49  
50 “unambiguous” variants to be those with at most one dissenting vote (score <0.2 or >0.8), which accounts for  
51  
52 87.1% of the variants. The 12.9% of SVs that were “ambiguous” (more than one dissenting vote,  $0.2 \leq \text{score}$   
53  
54  $\leq 0.8$ ) were generally small (median size of 310.5bp versus 899.5bp for all variants, **Fig 2C**) or contained  
55  
56 conflicting evidence (e.g., paired-end and split-read evidence indicated an inversion and the read-depth evidence  
57  
58 indicated a deletion, e.g., **Fig 1C**).  
59  
60  
61  
62  
63  
64  
65

1 1 Other methods, such as SVTYPER<sup>23</sup> and CNVNATOR<sup>24</sup>, can independently assess the validity of SV calls.  
2  
3 3 SVTYPER genotypes SVs for a given sample by comparing the number of discordant paired-end alignments  
4  
5 and split-read alignments that support the SV to the number of pairs and reads that support the reference allele.  
6  
7 CNVNATOR uses sequence coverage to estimate copy number for the region affected by the SV. Both of these  
8  
9 methods confirm the voting results (**Fig 2D**). Considering the set of “unambiguous” deletions, SVTYPER and  
10  
11 CNVNATOR agree with the *SV-plaudit* curation score in 92.3% and 81.7% of cases, respectively. Here,  
12  
13 agreement means that unambiguous false SVs (curation score < 0.2) have a CNVNATOR copy number near  
14  
15 two (between 1.4 and 2.4) or an SVTYPER genotype of homozygous reference. Unambiguous true SVs (curation  
16  
17 score > 0.8) have a CNVNATOR copy number near one or zero (less than 1.4), or an SVTYPER genotype of  
18  
19 non-reference (heterozygous or homozygous alternate).  
20  
21

22  
23  
24  
25  
26 Despite this consistency, using either SVTYPER or CNVNATOR to validate SVs can lead to false positives or  
27  
28 false negatives. For example, CNVNATOR reported a copy number loss for 44.2% of the deletions that were  
29  
30 scored as unanimously BAD, and SVTYPER called 30.7% of the deletions that were unanimously GOOD as  
31  
32 homozygous reference. Conversely, CNVNATOR had few false negatives (2.4% of unanimously GOOD  
33  
34 deletions were called as copy neutral), and SVTYPER had few false positives (0.2% of non-reference variants  
35  
36 were unanimously BAD).  
37  
38

39  
40  
41  
42 These results demonstrate that, with *SV-plaudit*, manual curation can be a cost-effective and robust part of the  
43  
44 SV detection process. While we anticipate that automated SV detection methods will continue to improve, due  
45  
46 in part to the improved truth sets that *SV-plaudit* will provide, directly viewing SVs will remain an essential  
47  
48 validation technique. By extending this validation to full call sets, *SV-plaudit* not only improves specificity but can  
49  
50 also enhance sensitivity by allowing user to relax quality filters and rapidly screen large sets of calls. Beyond  
51  
52 demonstrating *SV-plaudit*'s utility, our curation of SVs for NA12878 is useful as a high-quality truth set for method  
53  
54 development and tuning. A VCF of these variants annotated with their curation score is available in  
55  
56

57 **Supplementary File 5.**  
58

59  
60  
61  
62 **DISCUSSION**  
63  
64  
65

1 1 *SV-plaudit* is an efficient and scalable framework for the manual curation of large-scale SV call sets. Backed by  
2  
3 Amazon S3 and DynamoDB, *SV-plaudit* is easy to deploy and scales to teams of any size. Each instantiation of  
4  
5 *SV-plaudit* is completely independent and can be deployed locally for private or sensitive datasets, or be  
6  
7 distributed publicly to maximize participation. By rapidly providing a direct view of the raw data underlying  
8  
9 candidate SVs, *SV-plaudit* delivers the infrastructure to manually inspect full SV call sets. This functionality is  
10  
11 vital to a wide range of WGS experiments, from method development to the interpretation of disease genomes.  
12  
13 We are actively working on machine learning methods that will leverage the curation scores for thousands of SV  
14  
15 predictions as training data.  
16  
17  
18  
19  
20

## 21 **CONCLUSIONS**

22  
23 *SV-plaudit* was designed to judge how well the data in an alignment file corroborate a candidate SV. The question  
24  
25 of whether a particular SV is a false positive due to artifacts from sequencing or alignment is a broader issue  
26  
27 that must be answered in the context of other data sources such as mappability and repeat annotations. While  
28  
29 this second level of analysis is crucial, it is beyond the scope of this paper, and we argue this analysis be  
30  
31 performed only for those SVs that are fully supported by the alignment data. While *SV-plaudit* combines *samplot*  
32  
33 and *PlotCritic* to enable the curation of structural variant images, we emphasize that the *PlotCritic* framework  
34  
35 can be used to score images of any type. Therefore, we anticipate that this framework will facilitate "crowd-  
36  
37 sourced" curation of many other biological images.  
38  
39  
40  
41  
42  
43

## 44 **METHODS**

45  
46 **Overview.** *SV-plaudit* (**Fig 3**) is based on two software packages: *samplot* for SV image generation, and  
47  
48 *PlotCritic* for staging the Amazon cloud environment and managing user input. Once the environment is staged,  
49  
50 users log into the system and are presented with a series of SV images in either a random or predetermined  
51  
52 order. For each image, the user answers the curation question and responses are logged. Reports on the  
53  
54 progress of a project can be quickly generated at any point in the process.  
55  
56  
57  
58  
59  
60  
61  
62  
63  
64  
65

1 1 **Samplot.** *Samplot* is a Python program that uses *pysam*<sup>22</sup> to extract alignment data from a set of BAM or CRAM  
2  
3 files, and *matplotlib*<sup>23</sup> to visualize the raw data for the genomic region surrounding a candidate SV (**Fig 3A**). For  
4  
5 each alignment file, *samplot* renders the depth of sequencing coverage, paired-end alignments, and split-read  
6  
7 alignments where paired-end and split-read alignments are color-coded based by the type of SV they support  
8  
9 (e.g., black for deletion, red for a duplication, etc.) (**Fig 1**). Alignments are positioned along the x-axis by genomic  
10  
11 location and along the left y-axis by the distance between the ends (insert size), which helps users to differentiate  
12  
13 normal alignments from discordant alignments that support an SV. Depth of sequencing coverage is also  
14  
15 displayed on the right y-axis to allow users to inspect whether putative copy number changes are supported by  
16  
17 the expected changes in coverage. To improve performance for large events, we downsample “normal” paired-  
18  
19 end alignments (a +/- orientation and an insert size range that is within Z standard deviations from the mean; by  
20  
21 default Z = 4). Plots for each alignment file are stacked and share a common x-axis that reports the chromosomal  
22  
23 position. By convention, the sample of interest (e.g., proband or tumor) is displayed as the top track, followed by  
24  
25 the set of related reference genomes tracks (e.g., parents and siblings, matched normal sample). Users may  
26  
27 specify the exact order by using command line parameters to *samplot*. A visualization of all genes and exons  
28  
29 within the locus is displayed below the alignment plots to provide context for assessing the SV's relevance to  
30  
31 phenotypes. Rendering time depends on the number of samples and the size of the SV, but most images will  
32  
33 require less than 5 seconds, and *samplot* rendering can be parallelizable by SV call.  
34  
35  
36  
37  
38

39  
40  
41 **PlotCritic.** *PlotCritic* (**Fig 3B**) provides a simple web interface for scoring images and viewing reports that  
42  
43 summarize the results from multiple users and SV images. *PlotCritic* is both highly scalable and easy to deploy.  
44  
45 Images are stored on Amazon Web Services (AWS) S3 and DynamoDB tables store project configuration  
46  
47 metadata and user responses. These AWS services allow *PlotCritic* to dynamically scale to any number of users.  
48  
49 It also precludes the need for hosting a dedicated server, thereby facilitating deployment.  
50  
51  
52

53  
54  
55 After *samplot* generates the SV images, *PlotCritic* manages their transfer to S3 and configures tables in  
56  
57 DynamoDB based on a JSON configuration file (`config.json` file in **Fig 3B**). In this configuration file, one  
58  
59 defines the curation questions posed to reviewers, as well as the allowed answers and associated keyboard  
60  
61 bindings to allow faster responses (`curationQandA` field in **Fig 3B**). In turn, these dictate the text and buttons  
62  
63  
64  
65



1 1 that appear on the resulting web interface. As such, it allows the interface to be easily customized to support a  
2  
3 wide variety of curation scenarios. For example, a cancer experiment may display a tumor sample and matched  
4  
5 normal sample and ask users if the SV appears in both samples (i.e., a germline variant) or just in the tumor  
6  
7 sample (i.e., a somatic variant). To accomplish this, the curation question (`question` field in **Fig 3B**) could be  
8  
9 “In which samples does the SV appear?”, and the answer options (`answers` field in **Fig 3B**) could be “TUMOR”,  
10  
11 “BOTH”, “NORMAL”, “NEITHER”. Alternatively, in the case of a rare disease, the interface could display a  
12  
13 proband and parents and ask if the SV is only in the proband (i.e., de novo) or if it is also in a parent (i.e.,  
14  
15 inherited). Since there is no limit to the length of a questions or number of answers options, *PlotCritic* can support  
16  
17 more complex experimental scenarios.  
18  
19  
20

21  
22  
23  
24 Once results are collected, *PlotCritic* can generate a tab-delimited report or annotated VCF that, for each SV  
25  
26 image, details the number of times the image was scored and the full set of answers it received. Additionally, a  
27  
28 curation score can be calculated for each image by providing a value for each answer option and an aggregation  
29  
30 function (e.g., mean, median, mode, standard deviation, min, max). For example, consider the cancer example  
31  
32 from above where the values three, two, one, and zero mapped to the answers “TUMOR”, “BOTH”, “NORMAL”,  
33  
34 and “NEITHER”, respectively. If "mode" were selected as the curation function, then the curation score would  
35  
36 reflect the opinion of a plurality of users. The mean would reflect the consensus among all users, and the  
37  
38 standard deviation would capture the level of disagreement about each image. While we expect mean, median,  
39  
40 mode, standard deviation, min, and max to satisfy most use cases, users can implement custom scores by  
41  
42 operating on the tab-delimited reported.  
43  
44  
45

46  
47  
48 Each *PlotCritic* project is protected by AWS Cognito user authentication, which securely restricts access to the  
49  
50 project website to authenticated users. A project manager is the only authorized user at startup and can  
51  
52 authenticate other users using Cognito’s secure services. The website can be further secured using HTTPS and  
53  
54 additional controls, such as IP restrictions, can be put in place by configuring AWS IAM access controls directly  
55  
56 for S3 and DynamoDB.  
57  
58  
59

60  
61  
62 **AVAILABILITY OF SOURCE CODE AND REQUIREMENTS**  
63  
64  
65

1 1 Project name: SV-Plaudit  
2  
3 3 Project home page: <https://github.com/jbelyeu/SV-plaudit>  
4  
5 5 Operating systems: Mac OS and Linux  
6  
7  
8 8 Programing language: Python, bash  
9  
10 License: MIT  
11

12  
13  
14  
15 **AVAILABILITY OF SUPPORTING DATA AND MATERIAL**  
16

17 The datasets generated and/or analyzed during the current study are available in the 1000 Genomes Project  
18 repository, <ftp://ftp-trace.ncbi.nih.gov/1000genomes/ftp/phase3/data/>  
19  
20

21  
22  
23  
24 All data generated during this study are included in this published article and its supplementary information files.  
25

26  
27  
28 **DECLARATIONS**  
29  
30

31  
32  
33 **List of abbreviations**  
34

35 SV: Structural Variant  
36  
37

38  
39  
40 **Ethics approval and consent to participate**  
41

42 Not applicable  
43  
44

45  
46  
47 **Consent for publication**  
48

49 Not applicable  
50  
51

52  
53  
54 **Competing interests**  
55

56 The authors declare that they have no competing interests.  
57

58  
59  
60  
61 **Funding**  
62  
63  
64  
65

1 1 This research was supported by a US National Human Genome Research Institute awards to RML (NIH  
2  
3 K99HG009532) and ARQ (NIH R01HG006693 and NIH R01GM124355), as well as a US National Cancer  
4  
5 Institute award to ARQ (NIH U24CA209999).  
6  
7  
8  
9

#### 510 **Authors' contributions**

612 JRP and RML developed the software. JRB, TJN, BSP, TAS, JMH, SNK, MEC, BKL, and RML scored variants  
613  
14 for the experiment. JRP, ARQ, and RML wrote the manuscript. ARQ and RML conceived the study.  
715  
16  
17  
18

#### 919 **REFERENCES**

- 1022 1. Sudmant, P. H. *et al.* An integrated map of structural variation in 2,504 human genomes. *Nature* **526**, 75–  
23 81 (2015).  
1124
- 1226 2. Redon, R. *et al.* Global variation in copy number in the human genome. *Nature* **444**, 444–454 (2006).  
1227
- 1328 3. Newman, T. L. *et al.* A genome-wide survey of structural variation between human and chimpanzee.  
1329  
30 *Genome Res.* **15**, 1344–1356 (2005).  
1431
- 1533 4. Bailey, J. A. & Eichler, E. E. Primate segmental duplications: crucibles of evolution, diversity and disease.  
1534  
1635 *Nat. Rev. Genet.* **7**, 552–564 (2006).  
1636
- 1737 5. Payer, L. M. *et al.* Structural variants caused by Alu insertions are associated with risks for many human  
1738  
1839 diseases. *Proc. Natl. Acad. Sci. U. S. A.* **114**, E3984–E3992 (2017).  
1840
- 1942 6. Schubert, C. The genomic basis of the Williams-Beuren syndrome. *Cell. Mol. Life Sci.* **66**, 1178–1197  
1943  
2044 (2009).  
2045
- 2146 7. Pleasance, E. D. *et al.* A comprehensive catalogue of somatic mutations from a human cancer genome.  
2147  
2248 *Nature* **463**, 191–196 (2010).  
2249
- 2351 8. Venkitaraman, A. R. Cancer susceptibility and the functions of BRCA1 and BRCA2. *Cell* **108**, 171–182  
2352  
2453 (2002).  
2454
- 2555 9. Zhang, F., Gu, W., Hurles, M. E. & Lupski, J. R. Copy number variation in human health, disease, and  
2556  
2657 evolution. *Annu. Rev. Genomics Hum. Genet.* **10**, 451–481 (2009).  
2658  
2759  
2860  
2961  
3062  
3163  
3264  
3365

- 1 1 10. Ye, K., Schulz, M. H., Long, Q., Apweiler, R. & Ning, Z. Pindel: a pattern growth approach to detect break  
2  
3 points of large deletions and medium sized insertions from paired-end short reads. *Bioinformatics* **25**,  
4  
5 2865–2871 (2009).  
6  
7
- 4 8 11. Rausch, T. *et al.* DELLY: structural variant discovery by integrated paired-end and split-read analysis.  
9  
10 *Bioinformatics* **28**, i333–i339 (2012).  
11
- 6 12 12. Handsaker, R. E., Korn, J. M., Nemesh, J. & McCarroll, S. A. Discovery and genotyping of genome  
13  
14 structural polymorphism by sequencing on a population scale. *Nat. Genet.* **43**, 269–276 (2011).  
15  
16
- 8 17 13. Kronenberg, Z. N. *et al.* Wham: Identifying Structural Variants of Biological Consequence. *PLoS Comput.*  
18  
19 *Biol.* **11**, e1004572 (2015).  
20
- 10 21 14. Layer, R. M., Chiang, C., Quinlan, A. R. & Hall, I. M. LUMPY: a probabilistic framework for structural  
22  
23 variant discovery. *Genome Biol.* **15**, R84 (2014).  
24
- 12 25 15. Zook, J. M. *et al.* Integrating human sequence data sets provides a resource of benchmark SNP and indel  
26  
27 genotype calls. *Nat. Biotechnol.* **32**, 246–251 (2014).  
28  
29
- 14 30 16. Thorvaldsdóttir, H., Robinson, J. T. & Mesirov, J. P. Integrative Genomics Viewer (IGV): high-performance  
31  
32 genomics data visualization and exploration. *Brief. Bioinform.* **14**, 178–192 (2013).  
33  
34
- 16 35 17. Fiume, M., Williams, V., Brook, A. & Brudno, M. Savant: genome browser for high-throughput sequencing  
36  
37 data. *Bioinformatics* **26**, 1938–1944 (2010).  
38
- 18 39 18. Munro, J. E., Dunwoodie, S. L. & Giannoulatou, E. SVPV: a structural variant prediction viewer for paired-  
40  
41 end sequencing datasets. *Bioinformatics* **33**, 2032–2033 (2017).  
42
- 20 43 19. O'Brien, T. M., Ritz, A. M., Raphael, B. J. & Laidlaw, D. H. Gremlin: an interactive visualization model for  
44  
45 analyzing genomic rearrangements. *IEEE Trans. Vis. Comput. Graph.* **16**, 918–926 (2010).  
46  
47
- 22 48 20. Wyczalkowski, M. A. *et al.* BreakPoint Surveyor: a pipeline for structural variant visualization.  
49  
50 *Bioinformatics* **33**, 3121–3122 (2017).  
51
- 24 52 21. Spies, N., Zook, J. M., Salit, M. & Sidow, A. svviz: a read viewer for validating structural variants.  
53  
54  
55 *Bioinformatics* **31**, 3994–3996 (2015).  
56
- 26 57 22. [PDF]pysam documentation - Read the Docs.  
58
- 27 59 23. Hunter, J. D. Matplotlib: A 2D Graphics Environment. *Computing in Science Engineering* **9**, 90–95 (2007).  
60  
61  
62  
63  
64  
65

1 1 24. Chiang, C. *et al.* SpeedSeq: ultra-fast personal genome analysis and interpretation. *Nat. Methods* **12**,  
 2 2  
 3 3 966–968 (2015).  
 4 4  
 5 5 25. Abyzov, A., Urban, A. E., Snyder, M. & Gerstein, M. CNVnator: an approach to discover, genotype, and  
 6 6  
 7 7 characterize typical and atypical CNVs from family and population genome sequencing. *Genome Res.* **21**,  
 8 8  
 9 9 974–984 (2011).  
 10 10  
 11 11  
 12 12

13 13  
 14 14  
 15 15  
 16 16 **FIGURE LEGENDS**

17 17  
 18 18 **Figure 1.** Example *samplot* images of putative deletion calls that were scored as **A)** unanimously GOOD, **B)**  
 19 19  
 20 20 unanimously BAD, and **C)** ambiguous with a mix of GOOD and BAD scores. The black bar at the top of the figure  
 21 21  
 22 22 indicates the genomic position of the predicted SV, and the following subfigures visualize the alignments and  
 23 23  
 24 24 sequence coverage of each sample. Subplots report paired-end (square-ends connected by a solid line) and  
 25 25  
 26 26 split-read (circle-ends connected by a dashed line) alignments by their genomic position (x-axis) and the distance  
 27 27  
 28 28 between mapped ends (insert size, left y-axis). Colors indicate the type of event the alignment supports (black  
 29 29  
 30 30 for deletion, red for duplication, and blue and green for inversion) and intensity indicates the concentration of  
 31 31  
 32 32 alignments. The grey filled shapes report the sequence coverage distribution in the locus for each sample (right  
 33 33  
 34 34 y-axis).  
 35 35  
 36 36  
 37 37  
 38 38  
 39 39

40 40 **Figure 2.** A) The distribution of the time between when an image was presented and when it was scored. B) The  
 41 41  
 42 42 distribution of curation scores. C) The SV size distribution for all, unanimous (score 0 or 1), unambiguous (score  
 43 43  
 44 44 <0.2 or >0.8) and ambiguous (score  $\geq 0.2$  and  $\leq 0.8$ ) variants. D) A comparison of predictions for deletions  
 45 45  
 46 46 between CNVNATOR copy number calls (y-axis), SVTYPER genotypes (color, “Ref.” is homozygous reference  
 47 47  
 48 48 and “Non-ref.” is heterozygous or homozygous alternate), and curation scores (x-axis). This demonstrates a  
 49 49  
 50 50 general agreement between all methods with a concentration of reference genotypes and copy number two (no  
 51 51  
 52 52 evidence for a deletion) at curation score less than 0.2, and non-reference and copy number one or zero events  
 53 53  
 54 54 (evidence for a deletion) at curation score greater than 0.8. There are also false positives for CNVNATOR (copy  
 55 55  
 56 56 number less than 2 at score = 0), and false negatives for SVTYPER (reference genotype at score = 1).  
 57 57  
 58 58  
 59 59  
 60 60  
 61 61  
 62 62  
 63 63  
 64 64  
 65 65

1 **Figure 3.** The *SV-Plaudit* process. **A)** *Samplot* generates an image for each SV from VCF considering a set of  
2 alignment (BAM or CRAM) files. **B)** *PlotCritic* uploads the images to an Amazon S3 bucket and prepares  
3 DynamoDB tables. Users select a curation answer (“GOOD”, “BAD”, or “DE NOVO”) for each SV image.  
4 DynamoDB logs user responses and generates reports. Within a report, a curation score function can be  
5 specified by mapping answer options to values and selecting an aggregation function. Here “GOOD” and “DE  
6 NOVO” were mapped to one, “BAD” to zero, and the mean was used. One useful output option for a report is a  
7 VCF annotated with the curation scores (shown here in bold as a **SVP**).

A

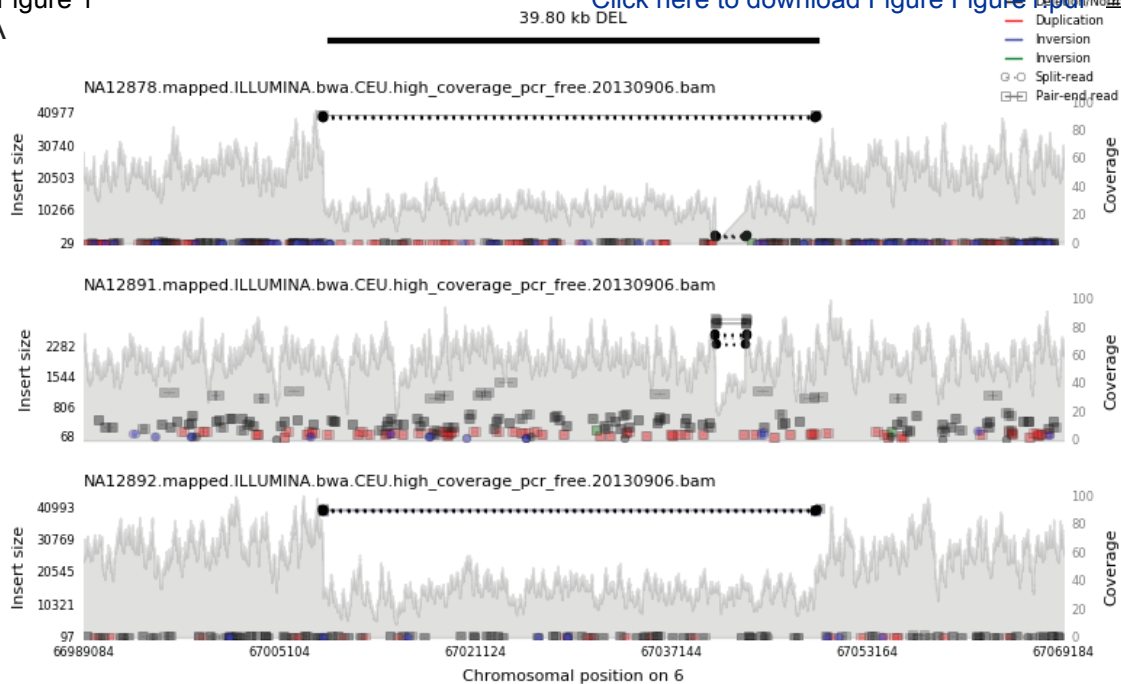

B

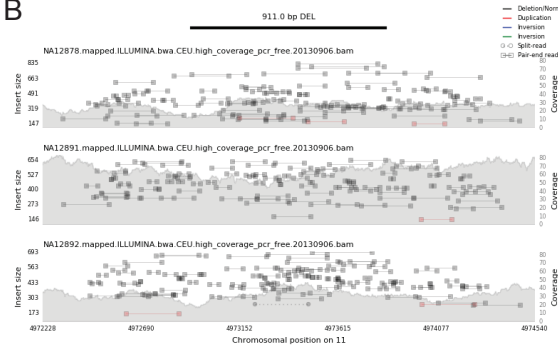

C

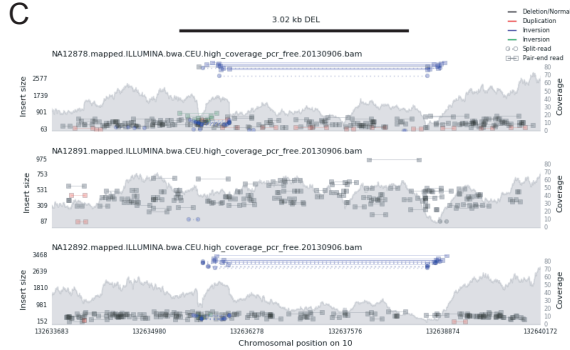

Figure 2

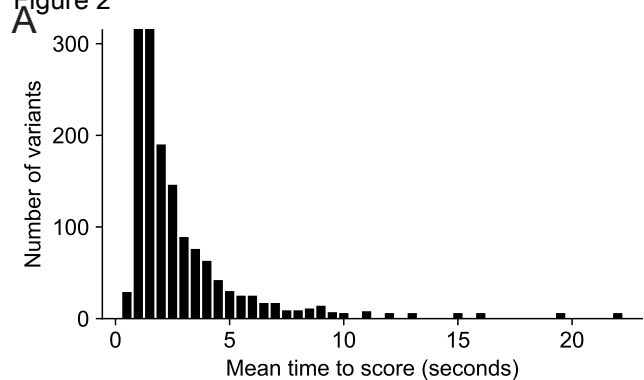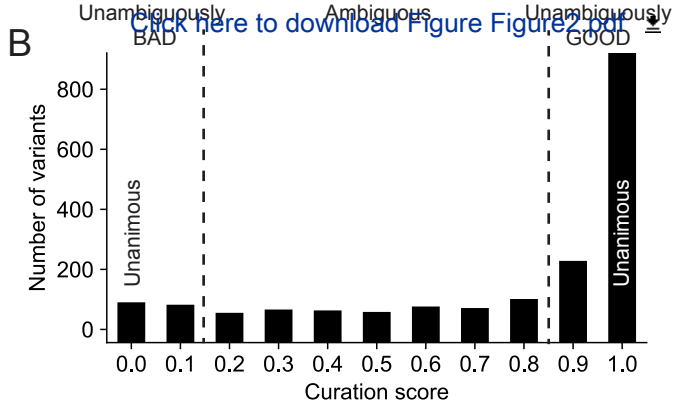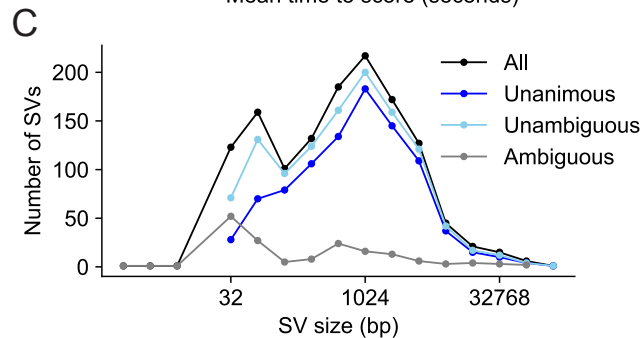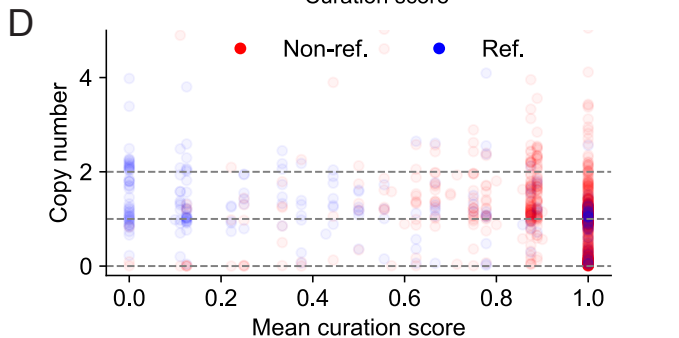



# Figure 3

[Click here to download Figure Figure3.pdf](#)

| #CHROM | POS      | INFO                                       |
|--------|----------|--------------------------------------------|
| 6      | 67009228 | SVTYPE=DEL;END=67049033 → <b>samplot</b> → |
| 11     | 4972926  | SVTYPE=DEL;END=4973937                     |
| 16     | 85149501 | SVTYPE=DEL;END=85150074                    |

BAMs  
 NA12878.bam  
 NA12891.bam  
 NA12892.bam

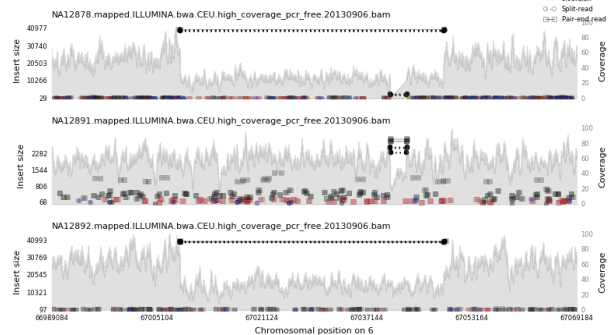

## B

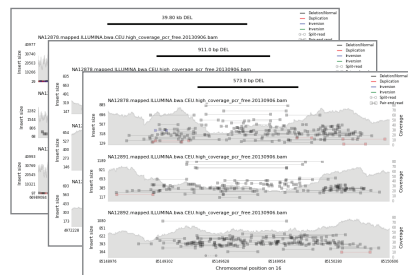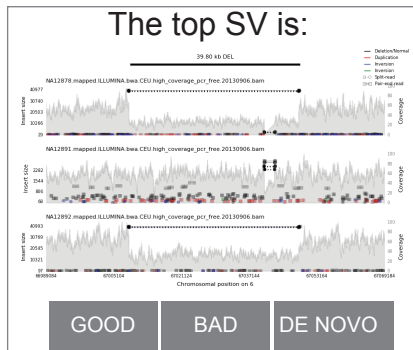

### User input

Type: DEL  
 Chrom: 6  
 Start: 67009228  
 End: 67049033  
 User: jon@utah.edu  
 Result: GOOD

### config.json

```
{ "curationVariables": {
  "curationQandA": {
    "question": "The top SV is:",
    "answers": {
      "g", "GOOD",
      "b", "BAD",
      "d", "DE NOVO" } },
  "AWSValues": { ... } }
```

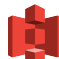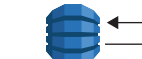

S3      DynamoDB

PlotCritic

### VCF report

| #CHROM | POS      | INFO                                    |
|--------|----------|-----------------------------------------|
| 6      | 67009228 | SVTYPE=DEL;END=67049033; <b>SVP=1.0</b> |
| 11     | 4972926  | SVTYPE=DEL;END=4973937; <b>SVP=0.0</b>  |
| 16     | 85149501 | SVTYPE=DEL;END=85150074; <b>SVP=0.5</b> |



Click here to access/download  
**Supplementary Material**  
NA12878.vcf





Click here to access/download  
**Supplementary Material**  
Supplemental\_File\_3.sh





Click here to access/download  
**Supplementary Material**  
Supplemental\_File\_4.csv



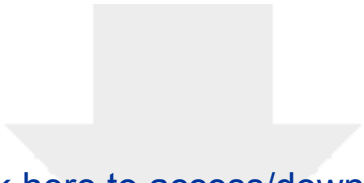

Click here to access/download  
**Supplementary Material**  
Supplemental\_File\_6.txt



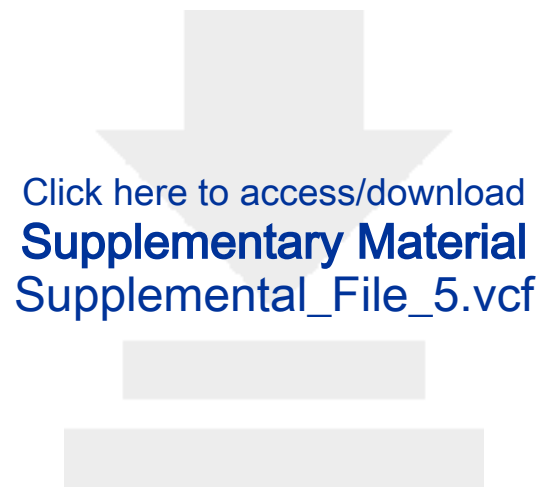

Click here to access/download  
**Supplementary Material**  
Supplemental\_File\_5.vcf
