# Supplementary material for: SV-plaudit: A cloud-based framework for manually curating thousands of structural variants
Source: PubMed Central journal article supplement (PMC6030999; doi:10.1093/gigascience/giy064), 2018-05-31
Supplement: giy064_response_to_reviewer_comments_revision_1.pdf [file giy064_response_to_reviewer_comments_revision_1.pdf]

## Author's Response To Reviewer Comments

Close

We added the citation for the data snapshot and RRID.

Close
